# Supplementary material
Source: PubMed Central journal article supplement (PMC6824201)
Supplement: NIHMS1056558-supplement-SI.pdf [file NIHMS1056558-supplement-SI.pdf]

Supporting information for the article

## Methylated Histidines Alter Tautomeric Preferences that Influence the Rates of Cu Nitrite Reductase Catalysis in Designed Peptides

Karl J. Koebke<sup>a</sup>, Fangting Yu<sup>a</sup>, Casey Van Stappen<sup>a</sup>, Tyler B. J. Pinter<sup>a</sup>, Aniruddha Deb<sup>a</sup>,  
James E. Penner-Hahn<sup>a</sup>, Vincent L. Pecoraro<sup>\*a</sup>

a: Department of Chemistry, University of Michigan Ann Arbor, MI 48109

**Table of Contents**

|                                                                                                                                                       |            |
|-------------------------------------------------------------------------------------------------------------------------------------------------------|------------|
| <b>1. EXAFS Fitting Parameters at pH 5.9 for all Constructs Reported .....</b>                                                                        | <b>S3</b>  |
| <b>2. XANES Comparison of Cu(II) Constructs Reported .....</b>                                                                                        | <b>S5</b>  |
| <b>3. EXAFS Signal Comparison at pH 5.9 .....</b>                                                                                                     | <b>S6</b>  |
| <b>4. Example Cu(II) Titration for <math>K_D</math> Determination .....</b>                                                                           | <b>S7</b>  |
| <b>5. Example Cu(I) Titration for <math>K_D</math> Determination .....</b>                                                                            | <b>S8</b>  |
| <b>6. Electron Paramagnetic Resonance Spectra and Fits .....</b>                                                                                      | <b>S9</b>  |
| <b>7. UV-Vis Spectra of <math>\text{Cu(II)(TRIW-}_{\text{em}}\text{H)}_3</math> and <math>\text{Cu(II)(TRIW-}_{\text{dm}}\text{H)}_3</math> .....</b> | <b>S10</b> |

**1. EXAFS Fitting Parameters at pH 5.9 for all constructs reported**

| Sample                                      | Model              | Cu-N R (Å) | Cu-N $\sigma^2$ (Å <sup>2</sup> )<br>1 x 10 <sup>-3</sup> | Cu-O R (Å) | Cu-O $\sigma^2$ (Å <sup>2</sup> )<br>1 x 10 <sup>-3</sup> | F  |
|---------------------------------------------|--------------------|------------|-----------------------------------------------------------|------------|-----------------------------------------------------------|----|
| Cu(I)(TRIW- $\delta_m$ H) <sub>3</sub>      | CuN <sub>2</sub>   | 1.93       | 5.5                                                       | N/A        | N/A                                                       | 95 |
|                                             | CuN <sub>3</sub>   | 1.94       | 7.2                                                       | N/A        | N/A                                                       | 58 |
|                                             | CuN <sub>2</sub> O | 1.93       | 8.7                                                       | 1.95       | 2.8                                                       | 52 |
|                                             | CuN <sub>3</sub> O | 1.94       | 7.6                                                       | 1.92       | 17.8                                                      | 50 |
| Cu(I)(TRIW- $\delta_m$ H L19A) <sub>3</sub> | CuN <sub>2</sub>   | 1.89       | 8.1                                                       | N/A        | N/A                                                       | 53 |
|                                             | CuN <sub>3</sub>   | 1.89       | 10.4                                                      | N/A        | N/A                                                       | 41 |
|                                             | CuN <sub>2</sub> O | 1.89       | 10.5                                                      | 1.90       | 9.0                                                       | 38 |
|                                             | CuN <sub>3</sub> O | 1.89       | 10.3                                                      | 1.46       | 94.8                                                      | 39 |
| Cu(I)(TRIW- $\epsilon_m$ H) <sub>3</sub>    | CuN <sub>2</sub>   | 1.90       | 9.4                                                       | N/A        | N/A                                                       | 45 |
|                                             | CuN <sub>3</sub>   | 1.90       | 11.8                                                      | N/A        | N/A                                                       | 54 |
|                                             | CuN <sub>2</sub> O | 1.89       | 9.1                                                       | 2.02       | 31                                                        | 42 |
|                                             | CuN <sub>3</sub> O | 1.90       | 10.9                                                      | 2.16       | 8.0                                                       | 47 |

**Table S1. Cu(I) EXAFS fitting parameters for all constructs reported in main manuscript. Only the parameters that were refined are shown. Histidine outer-shell paths are calculated using a rigid imidazole group as a model (denoted by “N” in the model designation). Fits were performed using all outer-shell paths.**

| Sample                                    | Model                           | Cu-N R (Å) | Cu-N $\sigma^2$ (Å <sup>2</sup> )<br>1 x 10 <sup>-3</sup> | Cu-O R (Å) | Cu- $\sigma^2$ (Å <sup>2</sup> )<br>1 x 10 <sup>-3</sup> | F     |
|-------------------------------------------|---------------------------------|------------|-----------------------------------------------------------|------------|----------------------------------------------------------|-------|
| Cu(II)(TRIW-H) <sub>3</sub>               | CuN <sub>2</sub> O <sub>2</sub> | 1.935      | 9.6                                                       | 1.990      | 12.0                                                     | 160   |
|                                           | CuN <sub>3</sub>                | 1.937      | 8.1                                                       | N/A        | N/A                                                      | 188   |
|                                           | CuN <sub>3</sub> O <sub>1</sub> | 1.910      | 7.9                                                       | 2.023      | 1.04                                                     | 103   |
|                                           | CuN <sub>3</sub> O <sub>2</sub> | 1.916      | 11.4                                                      | 1.987      | 7.0                                                      | 121   |
| Cu(II)(TRIW- $\delta_m$ H) <sub>3</sub>   | CuN <sub>2</sub> O <sub>2</sub> | 1.912      | 12.8                                                      | 1.962      | 4.2                                                      | 125   |
|                                           | CuN <sub>3</sub>                | 1.937      | 7.5                                                       | N/A        | N/A                                                      | 177   |
|                                           | CuN <sub>3</sub> O <sub>1</sub> | 1.913      | 10.5                                                      | 1.980      | 1.3                                                      | 113   |
|                                           | CuN <sub>3</sub> O <sub>2</sub> | 1.942      | 7.8                                                       | 1.923      | 21.2                                                     | 150   |
| Cu(II)(TRIW- $\epsilon_m$ H) <sub>3</sub> | CuN <sub>2</sub> O <sub>2</sub> | 1.929      | 11.3                                                      | 1.974      | 4.7                                                      | 131   |
|                                           | CuN <sub>3</sub>                | 1.951      | 7.4                                                       | N/A        | N/A                                                      | 250   |
|                                           | CuN <sub>3</sub> O <sub>1</sub> | 1.943      | 10.4                                                      | 1.972      | 2.9                                                      | 157   |
|                                           | CuN <sub>3</sub> O <sub>2</sub> | 1.935      | 23.1                                                      | 1.966      | 3.5                                                      | 145.2 |

**Table S2. Cu(II) EXAFS fitting parameters for all constructs reported in main manuscript. Only the parameters that were refined are shown. Histidine outer-shell paths are calculated using a rigid imidazole group as a model (denoted by “N” in the model designation). Fits were performed using all outer-shell paths.**

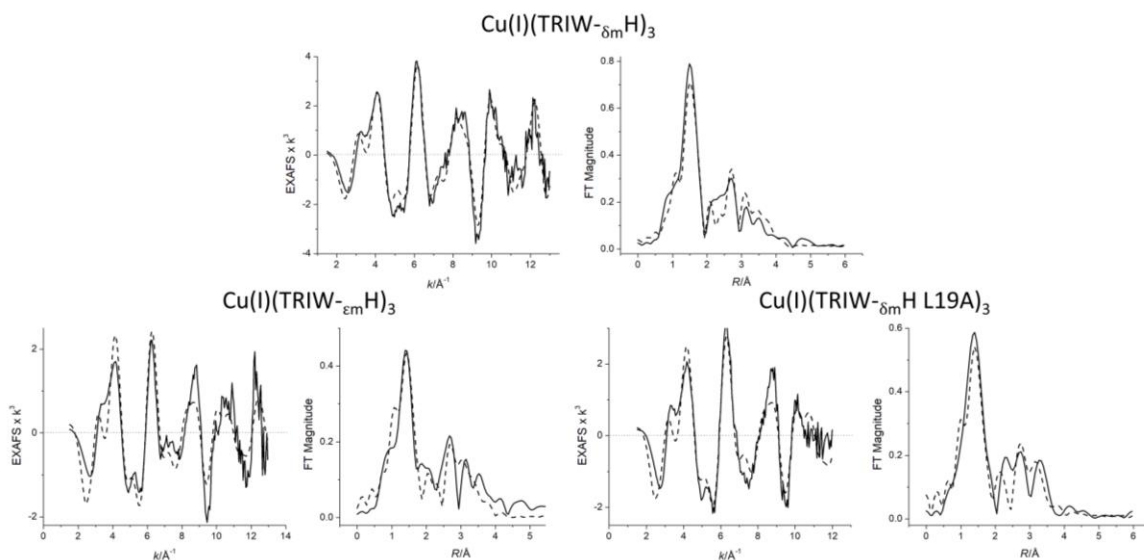

**Figure S1. EXAFS and the Fourier Transform of EXAFS of Cu(I) bound forms of all constructs reported at pH 5.9. Fits were created using the best fit models reported in main manuscript ( $\text{Cu}^{\text{I}}(\text{Imid})_3$  for all constructs)**

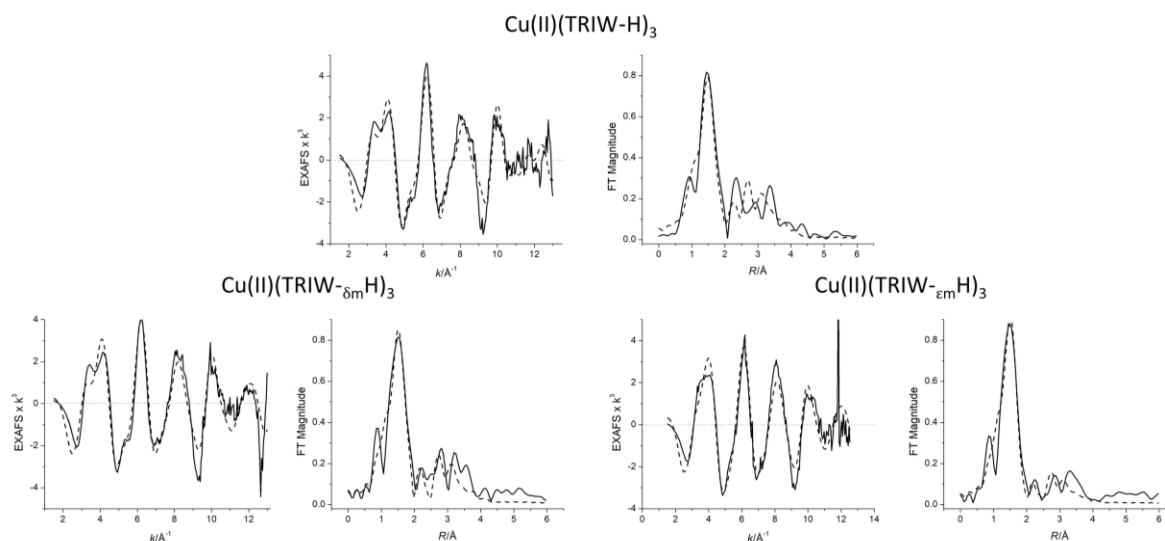

**Figure S2. EXAFS and the Fourier Transform of EXAFS of Cu(II) bound forms of TRIW-H, TRIW- $\delta$ mH, and TRIW- $\epsilon$ mH at pH 5.9. Fits were created using the best fit models reported in main manuscript ( $\text{Cu}^{\text{II}}(\text{Imid})_3\text{O}_1$  for TRIW-H and TRIW- $\delta$ mH and  $\text{Cu}^{\text{II}}(\text{Imid})_2\text{O}_2$  for TRIW- $\epsilon$ mH)**

## 2. XANES Comparison of Cu(II) Constructs Reported

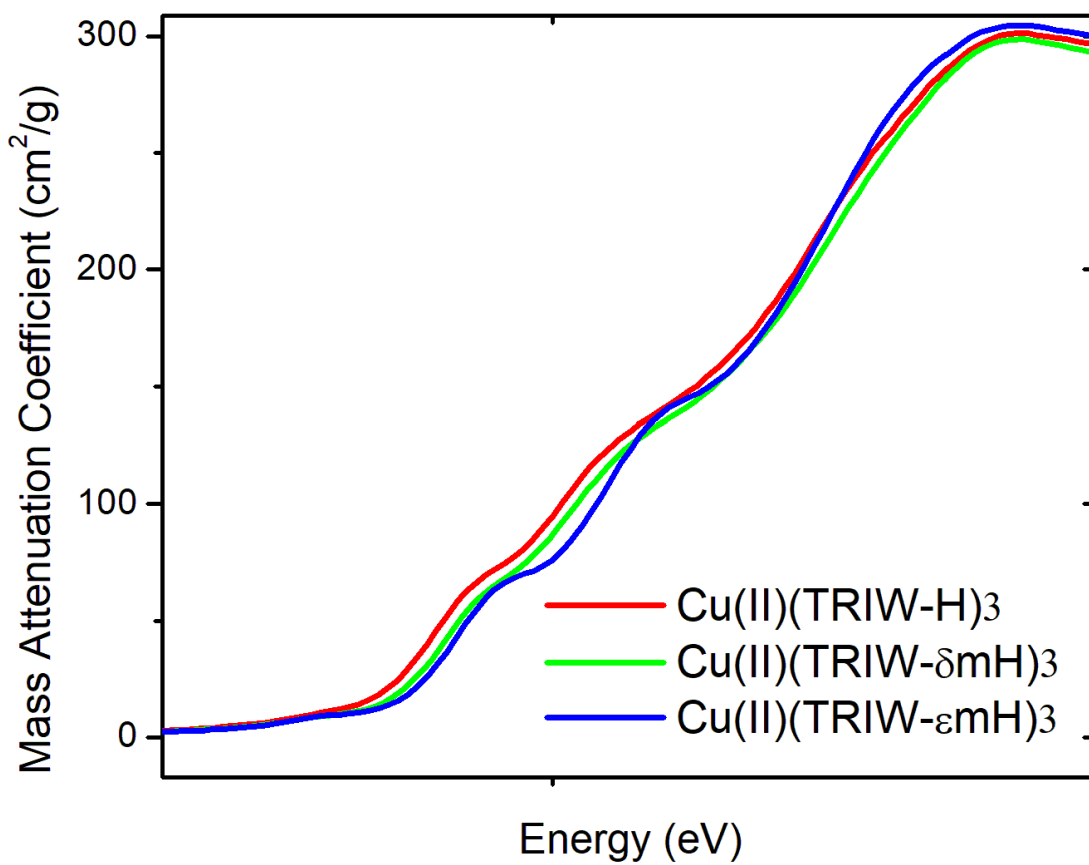

**Figure S3. Cu(II) XANES at pH 5.9 of methylated His constructs reported compared to that of TRIW-H**

### 3. EXAFS Signal Comparison at pH 5.9

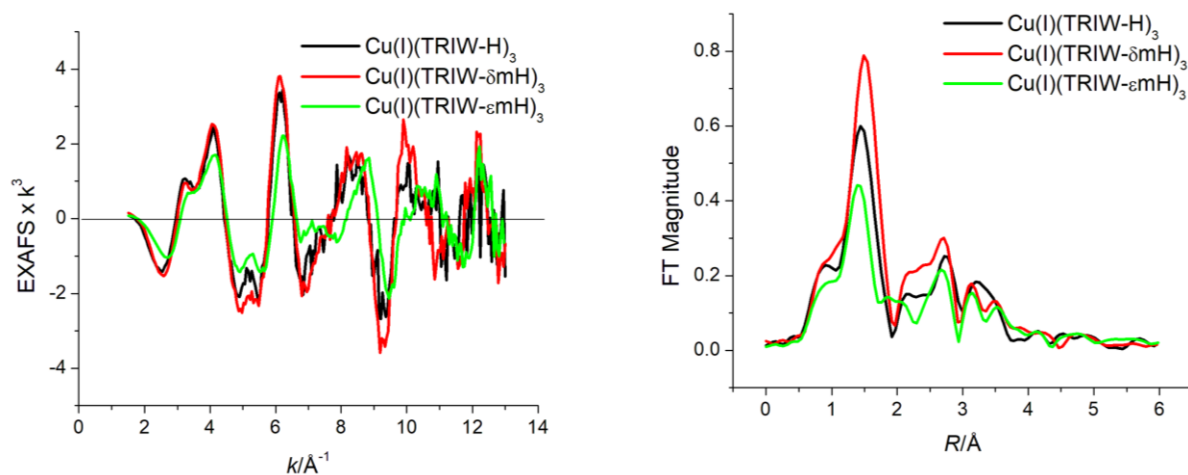

**Figure S4. Cu(I) EXAFS at pH 5.9 of methylated His constructs reported compared to that of TRIW-H**

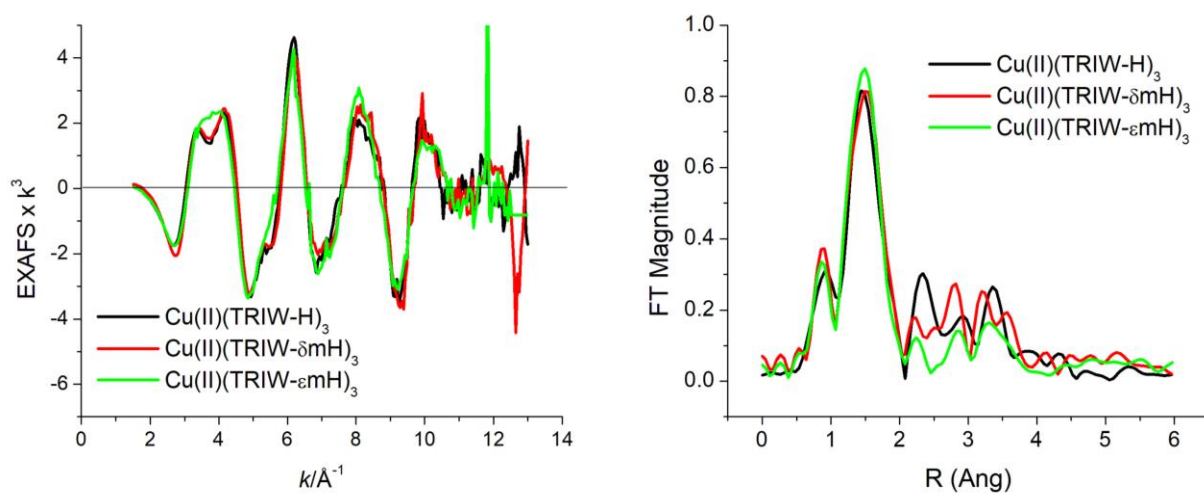

**Figure S5. Cu(II) EXAFS at pH 5.9 of methylated His constructs reported compared to that of TRIW-H**

#### 4. Example Cu(II) Titration for $K_D$ determination

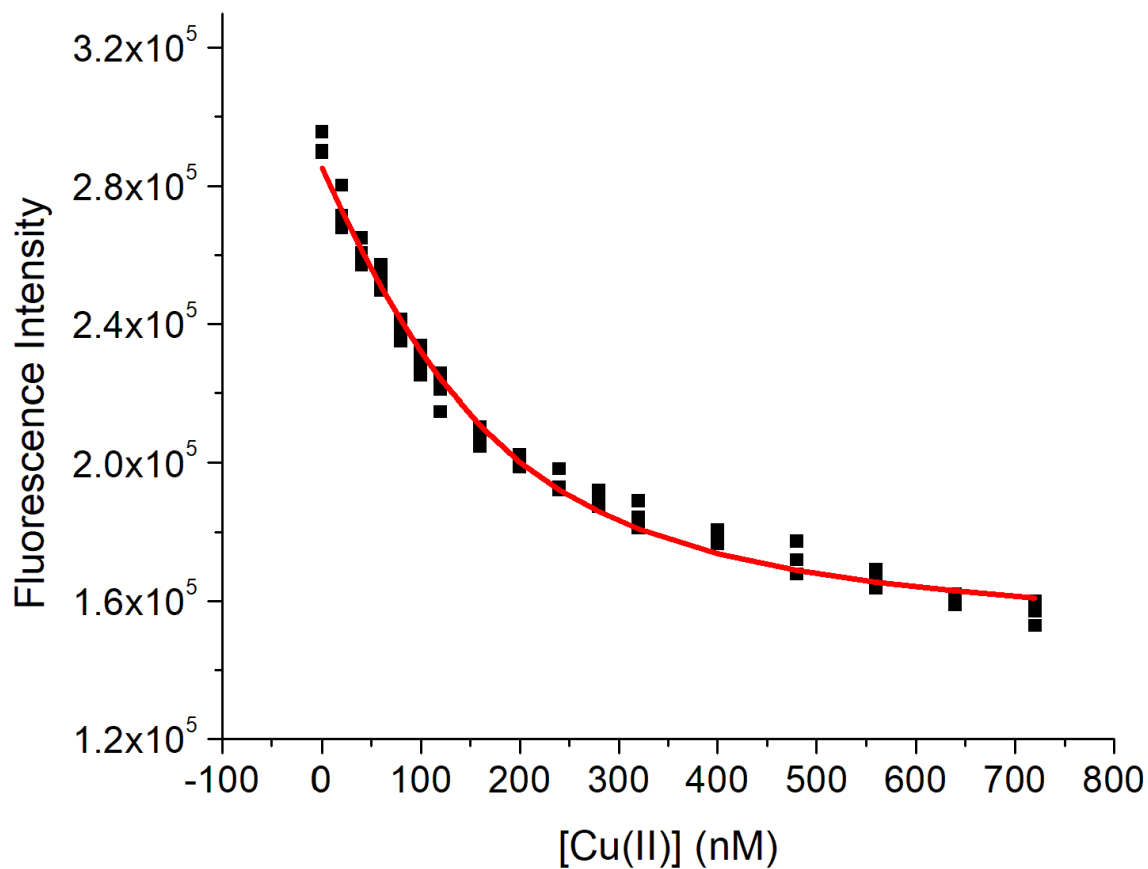

**Figure S6.** Titration of 140nM (TRIW- $\epsilon$ mH)<sub>3</sub> in 50mM MES at pH 5.9 with Cu(II). Titration was monitored via tryptophan fluorescence quenching. Data points are depicted in black while the fit is depicted in red.

### 5. Example Cu(I) Titration for $K_D$ determination

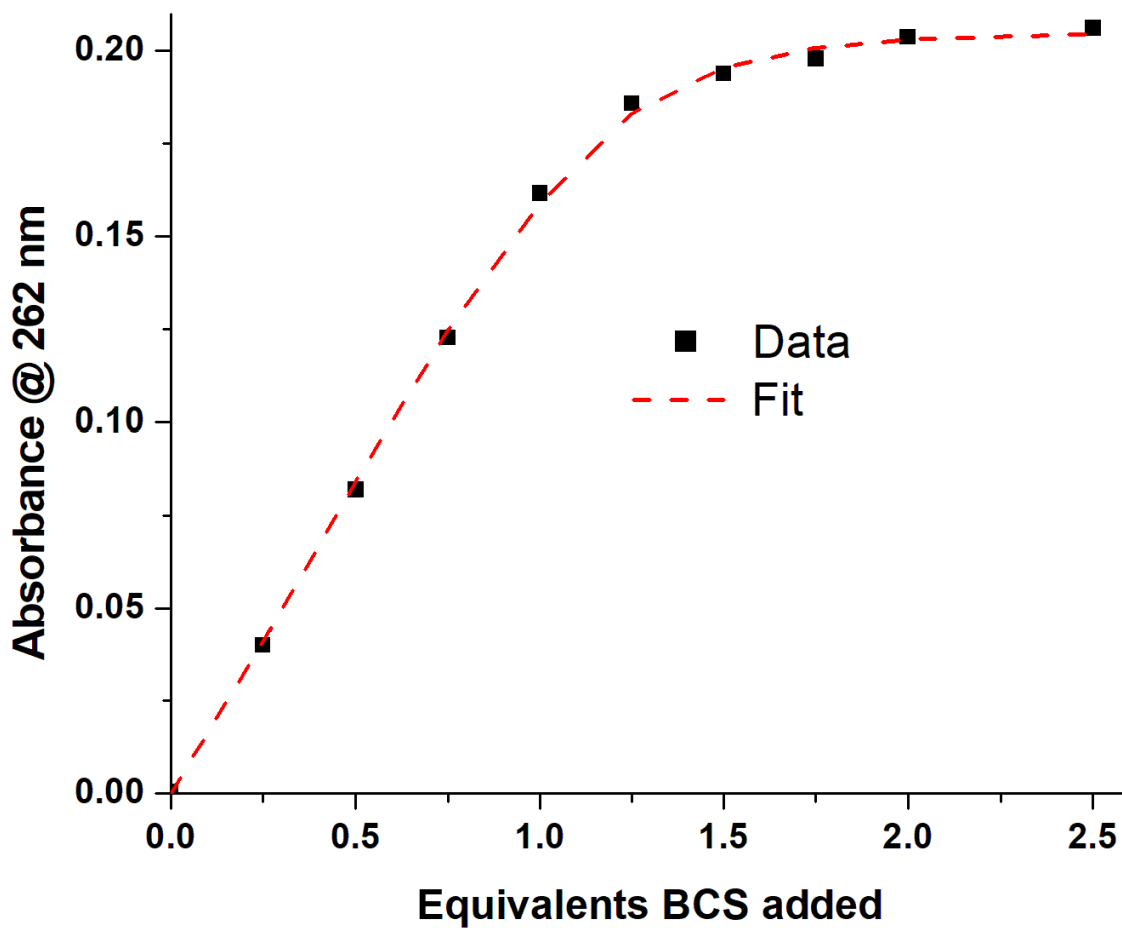

Figure S7. Titration of 100  $\mu\text{M}$   $(\text{TRIW-}_{\text{em}}\text{H})_3$  and 50  $\mu\text{M}$  Cu(I) in 50mM MES at pH 5.9 with bathocuproine disulfonate.



## 6. Electron Paramagnetic Resonance Spectra and Fits

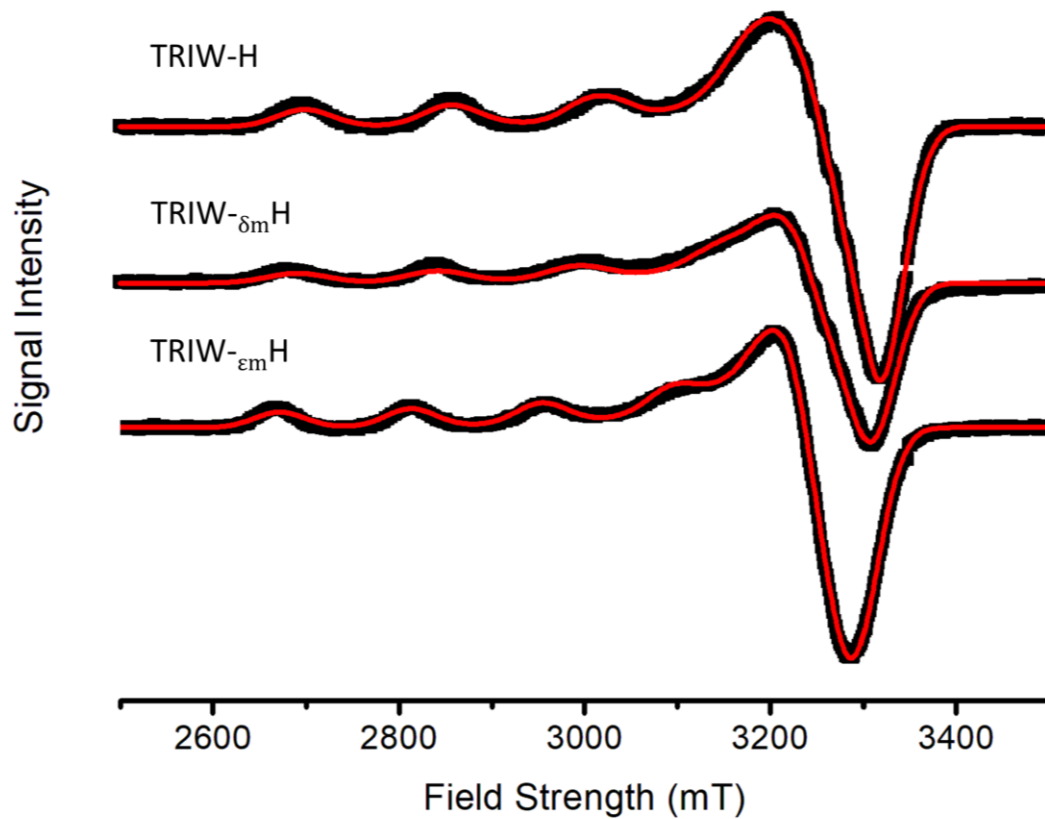

**Figure S8.** EPR spectra and fits for  $\text{Cu(II)(TRIW-H)}_3$ ,  $\text{Cu(II)(TRIW-}\delta_m\text{H)}_3$ , and  $\text{Cu(II)(TRIW-}\epsilon_m\text{H)}_3$  at pH 5.9. Fits were done using SpinCount.

## 7. UV-Vis Spectra of $\text{Cu(II)(TRIW-}\epsilon\text{mH)}_3$ and $\text{Cu(II)(TRIW-}\delta\text{mH)}_3$

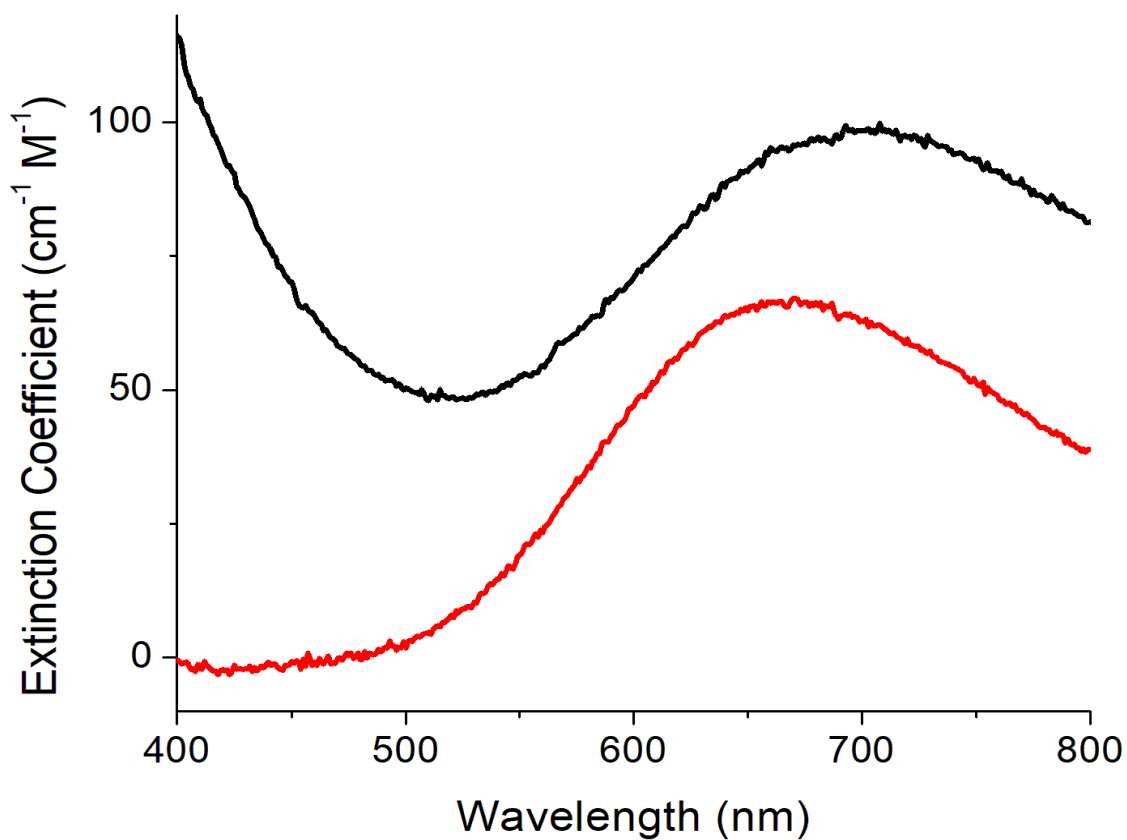

Figure S9. Electronic absorption spectra at pH 5.8 of 300  $\mu\text{M}$   $\text{Cu(II)}$  in the presence of 300  $\mu\text{M}$  (Black)  $\text{(TRIW-}\epsilon\text{mH)}_3$  or (red)  $\text{(TRIW-}\delta\text{mH)}_3$ .
